# Supplementary material for: Prevalence, treatment patterns, and healthcare resource utilization in Medicare and commercially insured non-dialysis-dependent chronic kidney disease patients with and without anemia in the United States
Source: Springer Nature journal article supplement (doi:10.1186/s12882-018-0861-1), 2018-03-15
Supplement: MOESM1 [file 15538036]

Table S1. Codes Used to Identify CKD, Anemia, Treatment, and Comorbid Conditions

| Disease or Condition    | Codes                                                                                                                                                                                                                                                                                                                                                                                                                                                                                                                                                                                                                                                                                                                                                                                                                                                                                                                                                                                                                                                                                                                                                                              |
|-------------------------|------------------------------------------------------------------------------------------------------------------------------------------------------------------------------------------------------------------------------------------------------------------------------------------------------------------------------------------------------------------------------------------------------------------------------------------------------------------------------------------------------------------------------------------------------------------------------------------------------------------------------------------------------------------------------------------------------------------------------------------------------------------------------------------------------------------------------------------------------------------------------------------------------------------------------------------------------------------------------------------------------------------------------------------------------------------------------------------------------------------------------------------------------------------------------------|
| CKD                     | ICD-9-CM diagnosis codes: 016.0; 095.4; 189.0; 189.9; 223.0; 236.91; 250.4; 271.4; 274.1; 283.11; 403.X0; 403.X1; 404.X0; 404.X1; 404.X2; 404.X3; 440.1; 442.1; 447.3; 572.4; 580-588; 591; 642.1; 646.2; 753.12-753.17; 753.19; 753.2; 794.4.                                                                                                                                                                                                                                                                                                                                                                                                                                                                                                                                                                                                                                                                                                                                                                                                                                                                                                                                     |
| Anemia                  | ICD-9-CM diagnosis codes: 280.0; 280.1; 280.8; 280.9; 281.0; 281.1; 281.2; 281.3; 281.4; 281.8; 281.9; 285.1; 285.21; 285.29; 285.8; 285.9.                                                                                                                                                                                                                                                                                                                                                                                                                                                                                                                                                                                                                                                                                                                                                                                                                                                                                                                                                                                                                                        |
| Comorbid conditions     | ICD-9-CM diagnosis codes or ICD-9-CM V codes                                                                                                                                                                                                                                                                                                                                                                                                                                                                                                                                                                                                                                                                                                                                                                                                                                                                                                                                                                                                                                                                                                                                       |
| ASHD                    | 410-414; V45.81; V45.82                                                                                                                                                                                                                                                                                                                                                                                                                                                                                                                                                                                                                                                                                                                                                                                                                                                                                                                                                                                                                                                                                                                                                            |
| CHF                     | 398.91;422; 425; 428; 402.X1; 404.x1; 404.x3; V42.1                                                                                                                                                                                                                                                                                                                                                                                                                                                                                                                                                                                                                                                                                                                                                                                                                                                                                                                                                                                                                                                                                                                                |
| CVA/TIA                 | 430-438                                                                                                                                                                                                                                                                                                                                                                                                                                                                                                                                                                                                                                                                                                                                                                                                                                                                                                                                                                                                                                                                                                                                                                            |
| PVD                     | 440-444; 447; 451-453; 557                                                                                                                                                                                                                                                                                                                                                                                                                                                                                                                                                                                                                                                                                                                                                                                                                                                                                                                                                                                                                                                                                                                                                         |
| Cardiac (other)         | 420-421;423-424; 429; 785.0-785.3; V42.2;V43.3                                                                                                                                                                                                                                                                                                                                                                                                                                                                                                                                                                                                                                                                                                                                                                                                                                                                                                                                                                                                                                                                                                                                     |
| COPD                    | 491-494; 496; 510                                                                                                                                                                                                                                                                                                                                                                                                                                                                                                                                                                                                                                                                                                                                                                                                                                                                                                                                                                                                                                                                                                                                                                  |
| GI                      | 456.0-456.2; 530.7; 531-534; 569.84; 569.85; 578                                                                                                                                                                                                                                                                                                                                                                                                                                                                                                                                                                                                                                                                                                                                                                                                                                                                                                                                                                                                                                                                                                                                   |
| Liver disease           | 570; 571; 572.1; 572.4; 573.1-573.3; V42.7                                                                                                                                                                                                                                                                                                                                                                                                                                                                                                                                                                                                                                                                                                                                                                                                                                                                                                                                                                                                                                                                                                                                         |
| Dysrhythmia             | 426-427; V45.0; V53.3                                                                                                                                                                                                                                                                                                                                                                                                                                                                                                                                                                                                                                                                                                                                                                                                                                                                                                                                                                                                                                                                                                                                                              |
| Cancer                  | 140-172; 174-208; 230-231; 233-234                                                                                                                                                                                                                                                                                                                                                                                                                                                                                                                                                                                                                                                                                                                                                                                                                                                                                                                                                                                                                                                                                                                                                 |
| Diabetes                | 250; 357.2; 362.0x; 366.41                                                                                                                                                                                                                                                                                                                                                                                                                                                                                                                                                                                                                                                                                                                                                                                                                                                                                                                                                                                                                                                                                                                                                         |
| Hypertension            | 362.11; 401.x-405.x; 437.2                                                                                                                                                                                                                                                                                                                                                                                                                                                                                                                                                                                                                                                                                                                                                                                                                                                                                                                                                                                                                                                                                                                                                         |
| Inflammatory conditions | ICD-9-CM diagnosis codes or ICD-9-CM V codes                                                                                                                                                                                                                                                                                                                                                                                                                                                                                                                                                                                                                                                                                                                                                                                                                                                                                                                                                                                                                                                                                                                                       |
| Chronic infections      | 730.1; 424.90; 042; 010-018; 117.5; 114; 117.3; 136.3                                                                                                                                                                                                                                                                                                                                                                                                                                                                                                                                                                                                                                                                                                                                                                                                                                                                                                                                                                                                                                                                                                                              |
| Crohn's disease         | 555                                                                                                                                                                                                                                                                                                                                                                                                                                                                                                                                                                                                                                                                                                                                                                                                                                                                                                                                                                                                                                                                                                                                                                                |
| Ulcerative colitis      | 556                                                                                                                                                                                                                                                                                                                                                                                                                                                                                                                                                                                                                                                                                                                                                                                                                                                                                                                                                                                                                                                                                                                                                                                |
| Hepatitis C             | 070.41, 070.44, 070.51, 070.54, 070.70, 070.71                                                                                                                                                                                                                                                                                                                                                                                                                                                                                                                                                                                                                                                                                                                                                                                                                                                                                                                                                                                                                                                                                                                                     |
| Gout                    | 274; V77.5                                                                                                                                                                                                                                                                                                                                                                                                                                                                                                                                                                                                                                                                                                                                                                                                                                                                                                                                                                                                                                                                                                                                                                         |
| Rheumatoid arthritis    | 714                                                                                                                                                                                                                                                                                                                                                                                                                                                                                                                                                                                                                                                                                                                                                                                                                                                                                                                                                                                                                                                                                                                                                                                |
| Anemia treatment        | EPO: HCPCS: 'J0885', 'J0886', 'Q4081', 'Q0136', 'Q4055'; and revenue code 0634 and 0635                                                                                                                                                                                                                                                                                                                                                                                                                                                                                                                                                                                                                                                                                                                                                                                                                                                                                                                                                                                                                                                                                            |
| ESAs: HCPCS Codes       | DPO: HCPCS: 'C1774', 'J0880', 'Q4054', 'Q0137', 'J0881', 'J0882'<br>PEG: HCPCS: 'Q2047', 'J0890'                                                                                                                                                                                                                                                                                                                                                                                                                                                                                                                                                                                                                                                                                                                                                                                                                                                                                                                                                                                                                                                                                   |
| ESAs: NDC Codes         | 420230260', '548682523', '548685673', '555130126', '555130144', '555130148', '555130267', '555130283', '555130478', '555130823', '596760302', '596760303', '596760304', '596760310', '596760312', '596760320', '596760340', '635520478', '635520823', '54569313700', '54868580200', '246460090', '246460091', '246460092', '246460093', '246460094', '246460095', '246460096', '246460097', '548685429', '548685867', '555130002', '555130003', '555130004', '555130005', '555130006', '555130008', '555130010', '555130011', '555130012', '555130013', '555130013', '555130015', '555130021', '555130023', '555130025', '555130027', '555130028', '555130032', '555130039', '555130041', '555130043', '555130044', '555130046', '555130048', '555130053', '555130054', '555130057', '555130090', '555130091', '555130092', '555130093', '555130094', '555130095', '555130096', '555130097', '555130110', '555130111', '597030043', '55513005804', '55513005801', '55513003704', '55513003701', '54868542800', '00062030302', '00062030402', '00062031002', '00062740003', '00062740103', '00062740201', '00062740501', '55513001401', '55513001404', '64764061010', '64764062020' |
| Intravenous iron        | HCPCS codes: J1760 - J1780; J2915; J2916; J1750; J1751; J1752; J1755; J1756; J1760; J1770; J1780; J1442; J1443; W0091; W0121; W0231; W0233; X0011; X0107; Q0138; Q0139                                                                                                                                                                                                                                                                                                                                                                                                                                                                                                                                                                                                                                                                                                                                                                                                                                                                                                                                                                                                             |

RBC transfusion

Revenue codes: 0380; 0381; 0382; 0391; value code: 37; procedure codes: 99.03;  
99.04; IP/SNF/OP/Medicare Part B HCPCS/CPT: P9010, P9011, P9016, P9021,  
P9022, P9038, P9039, P9040, P9051, P9054, P9056, P9057, P9058, 36430

---

ASHD, atherosclerotic heart disease; CHF, congestive/chronic heart failure; CKD, chronic kidney disease; COPD, chronic obstructive pulmonary disease; CPT, Current Procedural Terminology; CVA/TIA, cerebrovascular accident/transient ischemic attack; DPO, darbepoietin; EPO, erythropoietin; ESAs: erythropoietin-stimulating agents; GI, gastrointestinal; HCPCS, Healthcare Common Procedure Coding System; IP, inpatient; ICD-9-CM, International Classification of Diseases, Ninth Revision, Clinical Modification; NDC, National Drug Code; OP, outpatient; PEG, peginesatide (*note*: withdrawn from US market in February 2013); PVD, peripheral vascular disease; RBC, red blood cell; SNF, skilled nursing facility.
