# Supplementary material for: Prevalence, treatment patterns, and healthcare resource utilization in Medicare and commercially insured non-dialysis-dependent chronic kidney disease patients with and without anemia in the United States
Source: Springer Nature journal article supplement (doi:10.1186/s12882-018-0861-1), 2018-03-15
Supplement: MOESM3 [file 15538036]

Table S2. Baseline Characteristics and Comorbid Conditions in Stage 3-5 NDD-CKD Patients, 20% Medicare and Commercially Insured (MarketScan) Datasets

| Characteristics      | Medicare |           |                          | Commercially Insured |           |                          |
|----------------------|----------|-----------|--------------------------|----------------------|-----------|--------------------------|
|                      | Anemia   | No Anemia | Standardized Difference* | Anemia               | No Anemia | Standardized Difference* |
| <i>n</i> of patients | 109,251  | 108,828   | —                        | 15,716               | 40,472    | —                        |
| Age in years         |          |           |                          |                      |           |                          |
| 18-44                | —        | —         | —                        | 11.0                 | 12.2      | 3.9                      |
| 45-54                | —        | —         | —                        | 23.9                 | 25.1      | 2.7                      |
| 55-59                | —        | —         | —                        | 28.3                 | 27.6      | -1.5                     |
| 60-63                | —        | —         | —                        | 36.8                 | 35.1      | -3.6                     |
| 66-69                | 14.2     | 17.7      | 9.6                      | —                    | —         | —                        |
| 70-74                | 23.1     | 26.1      | 7.0                      | —                    | —         | —                        |
| 75-79                | 27.1     | 27.1      | 0.0                      | —                    | —         | —                        |
| 80-85                | 35.6     | 29.1      | -13.9                    | —                    | —         | —                        |
| Sex                  |          |           |                          |                      |           |                          |
| Men                  | 46.3     | 52.6      | 12.6                     | 47.9                 | 60.0      | 24.5                     |
| Women                | 53.7     | 47.4      | -12.6                    | 52.1                 | 40.0      | -24.5                    |
| Race <sup>†</sup>    |          |           |                          |                      |           |                          |
| White                | 80.2     | 84.3      | 10.7                     | —                    | —         | —                        |
| Black                | 14.0     | 10.2      | -11.7                    | —                    | —         | —                        |
| Other                | 5.8      | 5.5       | -1.3                     | —                    | —         | —                        |
| Comorbid conditions  |          |           |                          |                      |           |                          |
| ASHD                 | 52.2     | 36.4      | -32.2                    | 23.6                 | 13.9      | -24.9                    |
| CHF                  | 40.5     | 20.1      | -45.5                    | 21.4                 | 9.0       | -35.0                    |
| CVA/TIA              | 23.6     | 14.2      | -24.2                    | 10.0                 | 4.8       | -20.1                    |
| PVD                  | 35.6     | 21.1      | -32.6                    | 19.1                 | 7.5       | -34.5                    |
| Cardiac (other)      | 35.5     | 18.7      | -38.5                    | 23.5                 | 9.7       | -37.7                    |
| COPD                 | 33.8     | 20.5      | -30.2                    | 15.7                 | 7.9       | -24.2                    |
| GI                   | 12.6     | 1.9       | -42.2                    | 8.9                  | 1.4       | -34.7                    |
| Liver disease        | 3.7      | 1.5       | -13.9                    | 7.1                  | 2.5       | -21.5                    |
| Dysrhythmia          | 43.8     | 28.0      | -33.4                    | 19.5                 | 9.5       | -28.7                    |
| Cancer               | 20.6     | 13.6      | -18.7                    | 14.2                 | 7.7       | -20.9                    |

|                         |      |      |       |      |      |       |
|-------------------------|------|------|-------|------|------|-------|
| Diabetes                | 58.7 | 50.3 | -16.9 | 52.5 | 40.2 | -24.9 |
| Hypertension            | 96.5 | 92.9 | -16.1 | 85.4 | 73.8 | -29.1 |
| Inflammatory conditions |      |      |       |      |      |       |
| Glomerulonephritis      | 6.0  | 2.7  | -16.2 | 7.8  | 3.8  | -17.0 |
| Chronic infections      | 1.9  | 0.7  | -10.6 | 4.0  | 1.2  | -17.5 |
| Crohn's disease         | 0.8  | 0.3  | -6.8  | 1.3  | 0.5  | -8.4  |
| Ulcerative colitis      | 0.8  | 0.3  | -6.8  | 1.1  | 0.4  | -8.9  |
| Hepatitis C             | 0.6  | 0.3  | -4.5  | 2.3  | 0.9  | -10.5 |
| Gout                    | 16.3 | 11.4 | -14.2 | 9.7  | 7.9  | -6.2  |
| Rheumatoid arthritis    | 5.1  | 2.5  | -13.6 | 3.1  | 1.8  | -8.3  |

ASHD, atherosclerotic heart disease; CHF, congestive/chronic heart failure; CKD, chronic kidney disease; COPD, chronic obstructive pulmonary disease; CVA/TIA, cerebrovascular accident/transient ischemic attack; GI, gastrointestinal; NDD, non-dialysis-dependent; PVD, peripheral vascular disease.

\*Standardized (mean) difference is a measure of distance between two group means. Standardized values are not affected by sample size; thus, comparison across variables on different scales is possible. Differences were considered significant if the absolute value of the standardized difference was greater than 10.

†Race variable is not available in the MarketScan database.
