# Supplementary material for: Prevalence, treatment patterns, and healthcare resource utilization in Medicare and commercially insured non-dialysis-dependent chronic kidney disease patients with and without anemia in the United States
Source: Springer Nature journal article supplement (doi:10.1186/s12882-018-0861-1), 2018-03-15
Supplement: MOESM4 [file 15538036]

Table S3. Baseline Characteristics and Comorbidity in Stage 3-5 NDD-CKD Patients by Stage, 20% Medicare and Commercially Insured (MarketScan) Datasets

| Characteristics      | Medicare          |        |        |                       |        |       | Commercially Insured |       |       |                       |       |       |
|----------------------|-------------------|--------|--------|-----------------------|--------|-------|----------------------|-------|-------|-----------------------|-------|-------|
|                      | Anemia, CKD Stage |        |        | Non-Anemia, CKD Stage |        |       | Anemia, CKD Stage    |       |       | Non-Anemia, CKD Stage |       |       |
|                      | 3                 | 4      | 5      | 3                     | 4      | 5     | 3                    | 4     | 5     | 3                     | 4     | 5     |
| <i>n</i> of patients | 69,209            | 28,547 | 11,495 | 88,502                | 16,023 | 4,303 | 9,519                | 3,713 | 2,484 | 33,068                | 5,281 | 2,123 |
| Age, years           |                   |        |        |                       |        |       |                      |       |       |                       |       |       |
| 18-44                | ---               | ---    | ---    | ---                   | ---    | ---   | 9.8                  | 10.7  | 15.9  | 11.5                  | 14.0  | 18.3  |
| 45-54                | ---               | ---    | ---    | ---                   | ---    | ---   | 23.4                 | 24.5  | 25.0  | 24.7                  | 25.8  | 28.5  |
| 55-59                | ---               | ---    | ---    | ---                   | ---    | ---   | 29.0                 | 26.7  | 28.2  | 27.9                  | 26.5  | 25.6  |
| 60-63                | ---               | ---    | ---    | ---                   | ---    | ---   | 37.9                 | 38.1  | 30.9  | 35.8                  | 33.8  | 27.6  |
| 66-69                | 14.0              | 13.0   | 18.1   | 17.9                  | 15.5   | 21.7  | ---                  | ---   | ---   | ---                   | ---   | ---   |
| 70-74                | 23.3              | 22.3   | 23.8   | 26.5                  | 23.9   | 26.1  | ---                  | ---   | ---   | ---                   | ---   | ---   |
| 75-79                | 27.3              | 26.9   | 26.4   | 27.0                  | 27.4   | 26.3  | ---                  | ---   | ---   | ---                   | ---   | ---   |
| 80-84                | 35.4              | 37.8   | 31.7   | 28.5                  | 33.2   | 26.0  | ---                  | ---   | ---   | ---                   | ---   | ---   |
| Sex                  |                   |        |        |                       |        |       |                      |       |       |                       |       |       |
| Men                  | 46.7              | 44.2   | 49.1   | 52.4                  | 52.0   | 57.6  | 47.4                 | 46.0  | 52.8  | 60.1                  | 59.7  | 60.4  |
| Women                | 53.3              | 55.8   | 50.9   | 47.6                  | 48.0   | 42.4  | 52.6                 | 54.0  | 47.2  | 39.9                  | 40.3  | 39.6  |
| Race*                |                   |        |        |                       |        |       |                      |       |       |                       |       |       |
| White                | 81.6              | 79.9   | 72.8   | 84.7                  | 84.1   | 75.9  | ---                  | ---   | ---   | ---                   | ---   | ---   |
| Black                | 13.0              | 14.1   | 19.3   | 9.8                   | 10.5   | 17.0  | ---                  | ---   | ---   | ---                   | ---   | ---   |
| Other                | 5.4               | 6.0    | 7.9    | 5.5                   | 5.4    | 7.0   | ---                  | ---   | ---   | ---                   | ---   | ---   |
| Comorbid conditions  |                   |        |        |                       |        |       |                      |       |       |                       |       |       |
| ASHD                 | 51.0              | 53.5   | 56.7   | 35.3                  | 40.7   | 41.8  | 23.0                 | 24.3  | 24.6  | 13.5                  | 16.2  | 15.3  |
| CHF                  | 37.0              | 44.8   | 50.6   | 18.5                  | 26.7   | 28.8  | 19.2                 | 24.3  | 25.6  | 8.2                   | 12.5  | 13.4  |
| CVA/TIA              | 23.2              | 23.1   | 27.3   | 13.8                  | 15.2   | 18.4  | 9.8                  | 9.8   | 11.1  | 4.5                   | 5.5   | 6.2   |
| PVD                  | 34.1              | 36.2   | 42.9   | 20.1                  | 24.9   | 27.6  | 18.3                 | 18.9  | 22.2  | 7.1                   | 8.6   | 11.4  |
| Cardiac (other)      | 34.6              | 35.6   | 41.0   | 18.3                  | 19.9   | 22.8  | 22.7                 | 22.8  | 27.4  | 9.2                   | 10.4  | 15.1  |
| COPD                 | 33.2              | 33.7   | 37.6   | 19.9                  | 22.1   | 25.8  | 16.4                 | 13.5  | 16.3  | 7.8                   | 8.0   | 9.3   |
| GI bleeding          | 12.3              | 12.2   | 15.8   | 1.8                   | 1.8    | 3.0   | 8.5                  | 7.9   | 12.0  | 1.3                   | 1.1   | 3.7   |
| Liver disease        | 3.6               | 3.4    | 5.7    | 1.5                   | 1.3    | 2.6   | 6.6                  | 5.1   | 12.1  | 2.3                   | 2.3   | 6.0   |
| Dysrhythmia          | 42.9              | 44.0   | 48.3   | 27.2                  | 31.5   | 32.7  | 19.0                 | 18.9  | 22.2  | 9.2                   | 10.3  | 12.4  |
| Cancer               | 21.2              | 19.6   | 19.7   | 13.6                  | 13.5   | 13.5  | 15.1                 | 13.2  | 12.2  | 7.9                   | 6.8   | 6.4   |
| Diabetes             | 56.3              | 62.1   | 65.0   | 49.1                  | 55.3   | 54.3  | 51.3                 | 56.5  | 50.7  | 39.2                  | 46.0  | 41.0  |

|                         |      |      |      |      |      |      |      |      |      |      |      |      |
|-------------------------|------|------|------|------|------|------|------|------|------|------|------|------|
| Hypertension            | 95.9 | 97.4 | 97.4 | 92.6 | 94.9 | 92.0 | 84.1 | 87.5 | 87.1 | 73.1 | 77.6 | 75.1 |
| Inflammatory conditions |      |      |      |      |      |      |      |      |      |      |      |      |
| Glomerulonephritis      | 4.3  | 8.4  | 10.3 | 2.4  | 4.2  | 3.7  | 6.4  | 9.6  | 10.6 | 3.5  | 6.0  | 4.1  |
| Chronic infections      | 1.9  | 1.8  | 2.8  | 0.6  | 0.8  | 0.9  | 3.8  | 4.0  | 4.5  | 1.2  | 1.2  | 2.0  |
| Crohn's disease         | 0.7  | 0.8  | 0.9  | 0.3  | 0.3  | 0.3  | 1.4  | 1.1  | 1.1  | 0.5  | 0.6  | 0.7  |
| Ulcerative colitis      | 0.9  | 0.7  | 0.9  | 0.4  | 0.3  | 0.3  | 1.2  | 0.8  | 1.2  | 0.4  | 0.4  | 0.3  |
| Hepatitis C             | 0.6  | 0.6  | 1.3  | 0.3  | 0.4  | 1.0  | 2.1  | 1.6  | 3.9  | 0.8  | 1.1  | 2.7  |
| Gout                    | 14.1 | 20.2 | 20.3 | 10.7 | 15.0 | 12.9 | 9.3  | 10.7 | 9.5  | 7.7  | 9.7  | 7.5  |
| Rheumatoid arthritis    | 5.3  | 4.8  | 4.9  | 2.6  | 2.3  | 1.9  | 3.7  | 2.7  | 1.7  | 1.9  | 1.5  | 1.6  |

ASHD, atherosclerotic heart disease; CHF, congestive heart failure; CKD, chronic kidney disease; COPD, chronic obstructive pulmonary disease; CVA/TIA, cerebrovascular accident/transient ischemic attack; GI, gastrointestinal; NDD, non-dialysis-dependent; PVD, peripheral vascular disease.

\*Race variable is not available in the MarketScan database.
