# Supplementary material for: Prevalence, treatment patterns, and healthcare resource utilization in Medicare and commercially insured non-dialysis-dependent chronic kidney disease patients with and without anemia in the United States
Source: Springer Nature journal article supplement (doi:10.1186/s12882-018-0861-1), 2018-03-15
Supplement: MOESM5 [file 15538036]

Table S4. Anemia Treatment in Stage 3-5 NDD-CKD Patients with Anemia by Stage, 20%

Medicare and Commercially Insured (MarketScan) Datasets

| Treatment                              | Medicare,* CKD Stage |        |        |        | Commercially Insured, CKD Stage |      |      |      |
|----------------------------------------|----------------------|--------|--------|--------|---------------------------------|------|------|------|
|                                        | 3-5                  | 3      | 4      | 5      | 3-5                             | 3    | 4    | 5    |
| Total <i>n</i>                         | 109,251              | 69,209 | 28,547 | 11,495 | 15,716                          | 9519 | 3713 | 2484 |
| Patients treated, %                    |                      |        |        |        |                                 |      |      |      |
| ESA                                    | 12.7                 | 8.8    | 18.5   | 21.8   | 10.8                            | 6.5  | 15.7 | 19.9 |
| IV iron                                | 6.7                  | 5.6    | 8.3    | 9.6    | 9.4                             | 7.8  | 11.3 | 12.9 |
| RBC transfusion                        | 22.2                 | 20.5   | 22.6   | 31.2   | 11.7                            | 10.9 | 11.7 | 15.0 |
| Any                                    | 34.0                 | 29.4   | 39.1   | 48.8   | 26.2                            | 21.3 | 31.1 | 37.4 |
| Combination treatments, % <sup>†</sup> |                      |        |        |        |                                 |      |      |      |
| ESAs only                              | 7.1                  | 5.0    | 10.7   | 11.3   | 6.3                             | 3.7  | 9.6  | 11.1 |
| IV iron only                           | 3.0                  | 2.8    | 3.4    | 3.4    | 6.2                             | 5.9  | 7.2  | 6.2  |
| RBC transfusion only                   | 17.2                 | 16.8   | 16.1   | 22.3   | 8.5                             | 8.4  | 7.3  | 10.7 |
| ESAs and IV iron only                  | 1.7                  | 1.1    | 2.5    | 3.0    | 2.0                             | 0.9  | 2.6  | 5.1  |
| ESAs and RBC transfusion only          | 3.0                  | 2.1    | 4.1    | 5.7    | 2.0                             | 1.5  | 2.8  | 2.7  |
| IV iron and RBC transfusion only       | 1.1                  | 1.0    | 1.1    | 1.4    | 0.7                             | 0.7  | 0.9  | 0.6  |
| ESAs and IV iron and RBC transfusion   | 1.0                  | 0.7    | 1.3    | 1.8    | 0.6                             | 0.4  | 0.7  | 0.9  |

\*Including patients aged 66-85 years.

<sup>†</sup>Groups are mutually exclusive.

CKD, chronic kidney disease; ESA, erythropoiesis-stimulating agent; IV, intravenous; NDD, non-dialysis-dependent; RBC, red blood cell.
